# Supplementary material
Source: PubMed Central journal article supplement (PMC10683778)
Supplement: NIHMS1932184-supplement-Supplementary_Figures.pdf [file NIHMS1932184-supplement-Supplementary_Figures.pdf]

# **A method for comparing multiple imputation techniques: a case study on the U.S. National COVID Cohort Collaborative**

Elena Casiraghi<sup>1,2,3\*</sup>, Rachel Wong<sup>4,\*</sup>, Margaret Hall<sup>4</sup>, Ben Coleman<sup>5,6</sup>, Marco Notaro<sup>1,2</sup>, Michael D. Evans<sup>7</sup>, Jena S. Tronieri<sup>8</sup>, Hannah Blau<sup>5</sup>, Bryan Laraway<sup>9</sup>, Tiffany J. Callahan<sup>9</sup>, Lauren E. Chan<sup>10</sup>, Carolyn T. Bramante<sup>11</sup>, John B. Buse<sup>12,13</sup>, Richard A. Moffitt<sup>4</sup>, Til Stürmer<sup>14</sup>, Steven G. Johnson<sup>15</sup>, Yu Raymond Shao<sup>16,17</sup>, Justin Reese<sup>3</sup>, Peter N. Robinson<sup>5,6</sup>, Alberto Paccanaro<sup>18,19</sup>, Giorgio Valentini<sup>1,2</sup>, Jared D. Huling<sup>20,\*\*</sup> and Kenneth J. Wilkins<sup>21,\*\*</sup> on behalf of the N3C Consortium

<sup>1</sup> AnacletoLab, Department of Computer Science “Giovanni degli Antoni”, Università degli Studi di Milano, Milan, ITALY

<sup>2</sup> CINI, Infolife National Laboratory, Roma, ITALY

<sup>3</sup> Environmental Genomics and Systems Biology Division, Lawrence Berkeley National Laboratory, Berkeley, CA, USA

<sup>4</sup> Department of Biomedical Informatics, Stony Brook University, Stony Brook, NY, USA

<sup>5</sup> The Jackson Laboratory for Genomic Medicine, Farmington, USA

<sup>6</sup> Institute for Systems Genomics, University of Connecticut, Farmington, CT, USA

<sup>7</sup> Biostatistical Design and Analysis Center, Clinical and Translational Science Institute, University of Minnesota, Minneapolis, MN, USA

<sup>8</sup> Department of Psychiatry, Perelman School of Medicine at the University of Pennsylvania, Philadelphia, PA, USA

<sup>9</sup> University of Colorado, Anschutz Medical Campus, Aurora, CO, USA

<sup>10</sup> College of Public Health and Human Sciences, Oregon State University, Corvallis, USA

<sup>11</sup> Division of General Internal Medicine, University of Minnesota, Minneapolis, MN, USA

<sup>12</sup> NC Translational and Clinical Sciences Institute, University of North Carolina at Chapel Hill, Chapel Hill, NC, USA

<sup>13</sup> Division of Endocrinology, Department of Medicine, University of North Carolina School of Medicine, USA

<sup>14</sup> Department of Epidemiology, Gillings School of Global Public Health, University of North Carolina at Chapel Hill, Chapel Hill, NC, USA

<sup>15</sup> Institute for Health Informatics, University of Minnesota, Minneapolis, MN, USA

<sup>16</sup> Harvard-MIT Division of Health Sciences and Technology (HST), 260 Longwood Ave, Boston, USA

<sup>17</sup> Department of Radiation Oncology, UT Southwestern Medical Center, Dallas, USA

<sup>18</sup> School of Applied Mathematics (EMAp), Fundação Getúlio Vargas, Rio de Janeiro, BRAZIL

<sup>19</sup> Department of Computer Science, Royal Holloway, University of London, Egham, UK

<sup>20</sup> Division of Biostatistics, School of Public Health, University of Minnesota, Minneapolis, MN, USA

<sup>21</sup> Biostatistics Program, Office of the Director, National Institute of Diabetes and Digestive and Kidney Diseases, National Institutes of Health, Bethesda, MD, USA

N3C Consortium: Tell Bennet, Christopher Chute, Peter DeWitt, Kenneth Gersing, Andrew Girvin, Melissa Haendel, Jeremy Harper, Janos Hajagos, Stephanie Hong, Emily Pfaff, Jane Reusch, Corneliu Antoniescu, Kimberly Robaski

Corresponding Authors (\*): Elena Casiraghi, Rachel Wong

Co-senior Authorship (\*\*): Jared D Huling and Kenneth J. Wilkins equally contributed to the work

## Supplementary files

### **S1.xlsx:**

This Excel file contains all the results we obtained when using a number of imputation  $m = 42$ .

The file is composed by:

- sheet “mean\_measures\_m42” containing the colored table (Figure 5) showing and detailing the average measures obtained by the tested imputation algorithms across the three outcomes.
- sheets “RB\_mean” (see also [Supplementary Figure S1](#)), “MSE\_mean” (see also [Supplementary Figure S2](#)), “ER\_mean” (see also [Supplementary Figure S3](#)), and “CR\_mean” contain the four win-tie-loss tables (for the RB measure, the MSE measure, the ER measure, the CR measure) obtained by summing the wins, ties, losses obtained by each model over the three outcome variables.

On the right, each of the four sheets contains the mean of the win-tie-loss tables over the three outcomes, where the wins, ties, and losses are computed by comparing the models on the rows to the models on the column by a paired-sided paired rank sign test .

The grid shows numbers in the range  $[-3, +3]$ ; they are computed by representing each win by a +1 value, each tie as a 0 value, each loss as a -1 value.

### **S2.xlsx:**

This Excel file has the same structure of [S1.xlsx](#); it details all the results we obtained when using a number of imputation  $m = 5$ .

### **S3\_MCAR.xlsx:**

This Excel file has the same structure of [S1.xlsx](#) and [S2.xlsx](#); it details all the results we obtained when simulating MCAR missingness in the amputated datasets.

### **S4\_MNAR.xlsx:**

This Excel file has the same structure of [S1.xlsx](#) and [S2.xlsx](#) and [S3\\_MCAR.xlsx](#); it details all the results we obtained when simulating MNAR missingness in the amputated datasets.

## Supplementary Figures:

| ML algorithm | univariate imputation method | use outcomes | one-hot encode binned numeric predictors | one-hot encode categorical predictors | univariate imputation order | pmm donors  | average of absolute values of RB across outcomes | wins  | ties  | losses |     |     |
|--------------|------------------------------|--------------|------------------------------------------|---------------------------------------|-----------------------------|-------------|--------------------------------------------------|-------|-------|--------|-----|-----|
| amelia       |                              | F            | T                                        |                                       |                             |             | 0.029                                            | 1     | 4     | -94    |     |     |
|              |                              | T            | F                                        | T                                     |                             |             | 0.017                                            | 7     | 16    | -50    |     |     |
|              |                              | T            | F                                        |                                       |                             |             | 0.021                                            | 8     | 26    | -28    |     |     |
| mice         | default                      | F            |                                          |                                       | monotone                    |             | 0.012                                            | 6     | 16    | -63    |     |     |
|              |                              | T            | F                                        | F                                     | revmonotone                 |             | 0.012                                            | 5     | 18    | -60    |     |     |
|              |                              | F            |                                          |                                       | monotone                    |             | 0.012                                            | 7     | 14    | -63    |     |     |
|              |                              | T            | F                                        |                                       | revmonotone                 |             | 0.012                                            | 7     | 15    | -64    |     |     |
|              | logreg                       | F            |                                          |                                       | monotone                    |             | 0.013                                            | 5     | 6     | -85    |     |     |
|              |                              | T            | T                                        | T                                     | revmonotone                 |             | 0.013                                            | 5     | 3     | -89    |     |     |
|              |                              | F            |                                          |                                       | monotone                    |             | 0.011                                            | 18    | 21    | -34    |     |     |
|              |                              | T            | F                                        |                                       | revmonotone                 |             | 0.011                                            | 22    | 18    | -31    |     |     |
|              | norm                         | F            | T                                        |                                       |                             | monotone    |                                                  | 0.012 | 7     | 8      | -76 |     |
|              |                              |              | T                                        | F                                     |                             | revmonotone |                                                  | 0.012 | 6     | 5      | -80 |     |
|              |                              |              | F                                        |                                       |                             | monotone    |                                                  | 0.012 | 10    | 11     | -63 |     |
|              |                              |              | T                                        | F                                     |                             | revmonotone |                                                  | 0.013 | 9     | 10     | -66 |     |
| T            |                              | F            |                                          |                                       | monotone                    |             | 0.011                                            | 34    | 16    | -23    |     |     |
|              |                              | F            | T                                        | T                                     | revmonotone                 |             | 0.011                                            | 35    | 17    | -23    |     |     |
|              |                              | F            |                                          |                                       | monotone                    |             | 0.011                                            | 40    | 18    | -16    |     |     |
|              |                              | F            |                                          |                                       | revmonotone                 |             | 0.011                                            | 41    | 17    | -15    |     |     |
| missRanger   | extratrees                   | F            |                                          |                                       | monotone                    |             | 0.007                                            | 109   | 4     | 0      |     |     |
|              |                              |              |                                          |                                       | monotone                    | 3           | 0.008                                            | 40    | 8     | -38    |     |     |
|              |                              |              |                                          |                                       | monotone                    | 5           | 0.009                                            | 19    | 16    | -49    |     |     |
|              |                              |              |                                          |                                       | revmonotone                 |             | 0.007                                            | 107   | 4     | 0      |     |     |
|              |                              |              |                                          |                                       | revmonotone                 | 3           | 0.008                                            | 51    | 8     | -32    |     |     |
|              |                              |              |                                          |                                       | revmonotone                 | 5           | 0.009                                            | 22    | 13    | -49    |     |     |
|              |                              |              |                                          |                                       | monotone                    |             | 0.007                                            | 113   | 4     | -2     |     |     |
|              |                              |              |                                          |                                       | monotone                    | 3           | 0.010                                            | 26    | 17    | -30    |     |     |
|              |                              |              |                                          |                                       | monotone                    | 5           | 0.010                                            | 12    | 20    | -38    |     |     |
|              |                              |              |                                          |                                       | revmonotone                 |             | 0.007                                            | 114   | 4     | -2     |     |     |
|              |                              | T            |                                          |                                       |                             |             | monotone                                         |       | 0.010 | 27     | 15  | -29 |
|              |                              |              |                                          |                                       |                             |             | revmonotone                                      | 3     | 0.010 | 10     | 18  | -45 |
|              |                              |              |                                          |                                       |                             |             | monotone                                         |       | 0.006 | 83     | 16  | 0   |
|              |                              |              |                                          |                                       |                             |             | monotone                                         | 3     | 0.006 | 81     | 10  | -9  |
|              |                              |              |                                          |                                       |                             |             | monotone                                         | 5     | 0.007 | 86     | 14  | -14 |
|              |                              |              |                                          |                                       |                             |             | revmonotone                                      |       | 0.006 | 83     | 16  | 0   |
|              |                              |              |                                          |                                       |                             |             | revmonotone                                      | 3     | 0.006 | 84     | 8   | -8  |
|              |                              |              |                                          |                                       |                             |             | revmonotone                                      | 5     | 0.007 | 59     | 14  | -15 |
|              |                              |              |                                          |                                       |                             |             | monotone                                         |       | 0.006 | 51     | 13  | -9  |
|              |                              |              |                                          |                                       |                             |             | monotone                                         | 3     | 0.008 | 47     | 18  | -12 |
| F            |                              |              |                                          |                                       | monotone                    |             | 0.009                                            | 36    | 18    | -21    |     |     |
|              |                              |              |                                          |                                       | revmonotone                 |             | 0.006                                            | 50    | 14    | -8     |     |     |
|              |                              |              |                                          |                                       | revmonotone                 | 3           | 0.008                                            | 46    | 18    | -13    |     |     |
|              |                              |              |                                          |                                       | revmonotone                 | 5           | 0.008                                            | 34    | 18    | -25    |     |     |
|              |                              |              |                                          |                                       | monotone                    |             | 0.001                                            | 31    | 24    | -6     |     |     |
|              |                              |              |                                          |                                       | monotone                    |             | 0.001                                            | 32    | 24    | -6     |     |     |
|              |                              |              |                                          |                                       | monotone                    |             | 0.001                                            | 28    | 27    | -6     |     |     |
|              |                              |              |                                          |                                       | monotone                    |             | 0.001                                            | 28    | 27    | -6     |     |     |
| IPW          | logreg                       | F            | T                                        |                                       |                             |             | 0.002                                            | 5     | 11    | -48    |     |     |
|              |                              | T            | F                                        |                                       |                             |             | 0.004                                            | 3     | 4     | -60    |     |     |
|              | RF                           | F            | T                                        |                                       |                             |             | 0.013                                            | 0     | 3     | -79    |     |     |
|              |                              | T            | F                                        |                                       |                             |             | 0.017                                            | 0     | 2     | -82    |     |     |

Figure S1: Column “average absolute value of RB across predictors and outcomes” reports the average RB measure across the hospitalization, invasive ventilation, and patients’ survival outcomes (the table is also made available in Supplementary file S1 – sheet “RB\_mean”). Columns “wins”, “ties”, “losses” report the sum of, respectively, wins, ties, and losses computed by comparing the (absolute value of the) RB measures over the three outcomes (the corresponding win-tie-loss grid is shown in the Supplementary material). The comparison between two models over an outcome variable is performed with a sided Wilcoxon signed-rank test comparing the distribution of the (absolute) RB values for all the predictor variables. The winner is the model achieving the lowest RB distribution. All the models but missRanger with no pmm and using the outcome variables in the imputation model are obtaining  $RB \leq 0$ , meaning that the computed estimates are systematically lower than those computed on the complete dataset. missRanger with outcome variable in the imputation model and no pmm is instead bringing to the computation of inflated estimates.

| ML algorithm | univariate imputation method | use outcomes | one-hot encode binned numeric predictors | one-hot encode categorical predictors | univariate imputation order | pmm donors | average MSE across outcomes | wins  | ties | losses |     |
|--------------|------------------------------|--------------|------------------------------------------|---------------------------------------|-----------------------------|------------|-----------------------------|-------|------|--------|-----|
| amelia       |                              | F            | T                                        | T                                     | monotone                    |            | 0.007                       | 18    | 5    | -76    |     |
|              |                              | F            | F                                        |                                       | revmonotone                 |            | 0.004                       | 25    | 28   | -22    |     |
|              |                              | T            | T                                        |                                       | monotone                    |            | 0.005                       | 26    | 23   | -22    |     |
|              |                              | T            | F                                        |                                       | revmonotone                 |            | 0.003                       | 86    | 19   | -1     |     |
| mice         | default                      | F            | F                                        | F                                     | monotone                    |            | 0.002                       | 26    | 21   | -32    |     |
|              |                              | F            | F                                        |                                       | revmonotone                 |            | 0.002                       | 25    | 20   | -34    |     |
|              |                              | T            | F                                        |                                       | monotone                    |            | 0.002                       | 30    | 18   | -32    |     |
|              |                              | T            | F                                        |                                       | revmonotone                 |            | 0.002                       | 26    | 19   | -34    |     |
|              | logreg                       | F            | T                                        | T                                     | monotone                    |            | 0.003                       | 25    | 9    | -58    |     |
|              |                              | F            | T                                        |                                       | revmonotone                 |            | 0.003                       | 25    | 7    | -60    |     |
|              |                              | T            | T                                        |                                       | monotone                    |            | 0.002                       | 37    | 26   | -15    |     |
|              |                              | T            | T                                        |                                       | revmonotone                 |            | 0.002                       | 39    | 25   | -13    |     |
|              | norm                         | F            | T                                        | T                                     | monotone                    |            | 0.002                       | 28    | 13   | -43    |     |
|              |                              | F            | F                                        |                                       | revmonotone                 |            | 0.002                       | 27    | 9    | -48    |     |
|              |                              | F            | F                                        |                                       | monotone                    |            | 0.002                       | 30    | 16   | -33    |     |
|              |                              | F            | F                                        |                                       | revmonotone                 |            | 0.002                       | 28    | 17   | -34    |     |
|              |                              | T            | F                                        | monotone                              |                             | 0.002      | 54                          | 15    | -11  |        |     |
|              |                              |              |                                          | revmonotone                           |                             | 0.002      | 53                          | 16    | -9   |        |     |
|              |                              |              |                                          | monotone                              |                             | 0.002      | 57                          | 12    | -5   |        |     |
|              |                              |              |                                          | revmonotone                           |                             | 0.002      | 72                          | 14    | -2   |        |     |
| missRanger   | extratrees                   | F            | T                                        | monotone                              |                             | 0.001      | 93                          | 2     | 0    |        |     |
|              |                              |              |                                          | monotone                              | 3                           | 0          | 0.001                       | 38    | 22   | -22    |     |
|              |                              |              |                                          | monotone                              | 5                           | 0          | 0.001                       | 28    | 21   | -34    |     |
|              |                              |              |                                          | revmonotone                           |                             | 0.001      | 92                          | 3     | 0    |        |     |
|              |                              |              |                                          | revmonotone                           | 3                           | 0          | 0.001                       | 48    | 20   | -18    |     |
|              |                              |              |                                          | revmonotone                           | 5                           | 0          | 0.001                       | 31    | 21   | -29    |     |
|              |                              |              |                                          | monotone                              |                             | 0.001      | 88                          | 6     | -2   |        |     |
|              |                              |              |                                          | monotone                              | 3                           | 0          | 0.002                       | 34    | 27   | -13    |     |
|              |                              |              |                                          | monotone                              | 5                           | 0          | 0.002                       | 30    | 22   | -20    |     |
|              |                              |              |                                          | revmonotone                           |                             | 0.001      | 89                          | 6     | -2   |        |     |
|              |                              |              | T                                        | F                                     | monotone                    |            | 0.002                       | 43    | 25   | -8     |     |
|              |                              |              |                                          |                                       | revmonotone                 | 3          | 0                           | 0.002 | 43   | 25     | -8  |
|              |                              |              |                                          |                                       | revmonotone                 | 5          | 0                           | 0.002 | 30   | 23     | -24 |
|              |                              |              |                                          |                                       | monotone                    |            | 0.001                       | 47    | 20   | -2     |     |
|              |                              |              |                                          |                                       | monotone                    | 3          | 0                           | 0.001 | 70   | 12     | -11 |
|              |                              |              |                                          |                                       | monotone                    | 5          | 0                           | 0.001 | 84   | 13     | -12 |
|              |                              |              |                                          |                                       | revmonotone                 |            | 0.001                       | 46    | 21   | -2     |     |
|              |                              |              |                                          |                                       | revmonotone                 | 3          | 0                           | 0.001 | 74   | 8      | -8  |
|              |                              |              |                                          |                                       | revmonotone                 | 5          | 0                           | 0.001 | 85   | 10     | -17 |
|              |                              |              |                                          |                                       | monotone                    |            | 0.002                       | 36    | 7    | -28    |     |
|              |                              | F            | F                                        | monotone                              |                             | 0.002      | 47                          | 15    | -14  |        |     |
|              |                              |              |                                          | monotone                              | 5                           | 0          | 0.002                       | 42    | 16   | -18    |     |
|              |                              |              |                                          | revmonotone                           |                             | 0.002      | 36                          | 5     | -30  |        |     |
|              |                              |              |                                          | revmonotone                           | 3                           | 0          | 0.002                       | 44    | 17   | -15    |     |
|              |                              |              |                                          | revmonotone                           | 5                           | 0          | 0.002                       | 37    | 18   | -20    |     |
|              |                              |              |                                          | monotone                              |                             | 0.002      | 37                          | 18    | -20  |        |     |
| IPW          | logreg                       | F            | T                                        |                                       |                             | 0.007      | 13                          | 3     | -130 |        |     |
|              |                              | F            | F                                        |                                       |                             | 0.007      | 14                          | 2     | -130 |        |     |
|              |                              | T            | T                                        |                                       |                             | 0.007      | 12                          | 2     | -132 |        |     |
|              | RF                           | F            | F                                        |                                       |                             | 0.007      | 12                          | 3     | -131 |        |     |
|              |                              | F            | T                                        |                                       |                             | 0.008      | 6                           | 1     | -144 |        |     |
|              |                              | T            | F                                        |                                       |                             | 0.007      | 7                           | 1     | -143 |        |     |
|              |                              |              |                                          |                                       |                             | 0.007      | 1                           | 1     | -150 |        |     |
|              |                              |              |                                          |                                       |                             | 0.007      | 0                           | 1     | -151 |        |     |

Figure S2: Column “average MSE across predictors and outcomes” reports the average MSE measure across the hospitalization, invasive ventilation, and patients’ survival outcomes (the table is also made available in Supplementary file S1 – sheet “MSE\_mean”). Columns “wins”, “ties”, “losses” report the sum of, respectively, wins, ties, and losses computed by comparing the MSE measures over the three outcomes (the corresponding win-tie-loss grid is shown in the Supplementary material). The comparison between two models over an outcome variable is performed with a sided Wilcoxon signed-rank test comparing the distribution of the MSE values for all the predictor variables. The winner is the model achieving the lowest MSE distribution. The detailed win-tie-loss grids are reported in the Supplementary material.

| ML algorithm | univariate imputation method | use outcomes | one-hot encode binned numeric predictors | one-hot encode categorical predictors | univariate imputation order | pmm donors | average ER across outcomes | wins | ties | losses |
|--------------|------------------------------|--------------|------------------------------------------|---------------------------------------|-----------------------------|------------|----------------------------|------|------|--------|
| amelia       |                              | F            | T                                        | T                                     |                             |            | 0.900                      | 0    | 5    | -84    |
|              |                              | F            | F                                        |                                       |                             |            | 0.949                      | 4    | 21   | -43    |
|              |                              | T            | T                                        |                                       |                             |            | 0.914                      | 6    | 31   | -25    |
|              |                              | T            | F                                        |                                       |                             |            | 0.971                      | 34   | 23   | -13    |
| mice         | default                      | F            | F                                        | F                                     | monotone                    |            | 0.962                      | 6    | 14   | -54    |
|              |                              | revmonotone  |                                          |                                       |                             | 0.964      | 6                          | 14   | -52  |        |
|              |                              | monotone     |                                          |                                       |                             | 0.963      | 8                          | 17   | -47  |        |
|              |                              | revmonotone  |                                          |                                       |                             | 0.962      | 9                          | 12   | -53  |        |
|              | logreg                       | F            | T                                        | T                                     | monotone                    |            | 0.950                      | 5    | 10   | -76    |
|              |                              | revmonotone  |                                          |                                       |                             | 0.950      | 5                          | 7    | -77  |        |
|              |                              | monotone     |                                          |                                       |                             | 0.952      | 16                         | 21   | -31  |        |
|              |                              | revmonotone  |                                          |                                       |                             | 0.952      | 17                         | 25   | -30  |        |
|              | norm                         | F            | F                                        | T                                     | monotone                    |            | 0.952                      | 9    | 13   | -67    |
|              |                              | revmonotone  |                                          |                                       |                             | 0.950      | 7                          | 12   | -68  |        |
|              |                              | monotone     |                                          |                                       |                             | 0.963      | 7                          | 16   | -53  |        |
|              |                              | revmonotone  |                                          |                                       |                             | 0.961      | 6                          | 14   | -55  |        |
| missRanger   | extratrees                   | F            | T                                        | T                                     | monotone                    | 3          | 0.952                      | 110  | 6    | 0      |
|              |                              |              |                                          |                                       | monotone                    | 5          | 0.958                      | 44   | 15   | -23    |
|              |                              |              |                                          |                                       | monotone                    | 5          | 0.956                      | 29   | 19   | -33    |
|              |                              |              |                                          |                                       | revmonotone                 | 5          | 0.951                      | 111  | 6    | 0      |
|              |                              | T            | monotone                                 | 3                                     | 0.958                       | 54         | 18                         | -17  |      |        |
|              |                              |              | revmonotone                              | 5                                     | 0.955                       | 30         | 20                         | -29  |      |        |
|              |                              |              | monotone                                 | 3                                     | 0.955                       | 103        | 6                          | 0    |      |        |
|              |                              |              | monotone                                 | 5                                     | 0.960                       | 24         | 21                         | -19  |      |        |
| IPW          | RF                           | F            | F                                        | F                                     | monotone                    | 5          | 0.961                      | 13   | 24   | -24    |
|              |                              |              |                                          |                                       | revmonotone                 | 3          | 0.956                      | 103  | 6    | 0      |
|              |                              |              |                                          |                                       | revmonotone                 | 3          | 0.959                      | 25   | 21   | -19    |
|              |                              |              |                                          |                                       | revmonotone                 | 5          | 0.960                      | 11   | 26   | -29    |
|              |                              | T            | monotone                                 | 3                                     | 1.032                       | 45         | 20                         | 0    |      |        |
|              |                              |              | monotone                                 | 5                                     | 0.971                       | 79         | 9                          | -7   |      |        |
|              |                              |              | monotone                                 | 5                                     | 0.967                       | 85         | 12                         | -14  |      |        |
|              |                              |              | revmonotone                              | 3                                     | 1.038                       | 42         | 22                         | 0    |      |        |
| F            | revmonotone                  | 3            | 0.972                                    | 82                                    | 9                           | -6         |                            |      |      |        |
|              | revmonotone                  | 5            | 0.968                                    | 80                                    | 13                          | -16        |                            |      |      |        |
|              | monotone                     | 3            | 1.038                                    | 12                                    | 27                          | -15        |                            |      |      |        |
|              | monotone                     | 5            | 0.979                                    | 29                                    | 24                          | -10        |                            |      |      |        |
| logreg       | F                            | T            | F                                        | monotone                              | 3                           | 0.980      | 24                         | 21   | -15  |        |
|              | revmonotone                  |              |                                          | 3                                     | 1.038                       | 14         | 25                         | -15  |      |        |
|              | monotone                     |              |                                          | 5                                     | 0.980                       | 31         | 21                         | -12  |      |        |
|              | revmonotone                  |              |                                          | 5                                     | 0.979                       | 24         | 21                         | -19  |      |        |
| amelia       |                              | F            | T                                        |                                       |                             |            | 0.946                      | 18   | 35   | -6     |
|              |                              | F            | F                                        |                                       |                             |            | 0.946                      | 19   | 34   | -6     |
|              |                              | T            | T                                        |                                       |                             |            | 0.950                      | 17   | 36   | -6     |
|              |                              | T            | F                                        |                                       |                             |            | 0.950                      | 19   | 34   | -6     |
| IPW          | RF                           | F            | T                                        |                                       |                             |            | 0.937                      | 4    | 8    | -52    |
|              |                              | F            | F                                        |                                       |                             |            | 0.946                      | 3    | 5    | -54    |
|              |                              | T            | T                                        |                                       |                             |            | 0.835                      | 0    | 3    | -84    |
|              |                              | T            | F                                        |                                       |                             |            | 0.857                      | 0    | 3    | -89    |

Figure S3: In column “average ER across outcomes” we report the average ER measure across the hospitalization, invasive ventilation, and patients’ survival outcomes (the table is also made available in Supplementary file S1 – sheet “ER\_mean”). Columns “wins”, “ties”, “losses” report the sum of, respectively, wins, ties, and losses computed by comparing the distributions of the ER measures over the three outcomes. Since we would like each  $[ER_i]$  ( $i \in \{1, \dots, d\}$ ) estimate to be as nearest as possible to 1, for the comparison between two models over an outcome variable we used a sided Wilcoxon signed-rank test to compare the following distribution for each model  $f(ER_i) = ||1 - ER_i||$ . The detailed win tie loss grids are reported in the supplementary material.

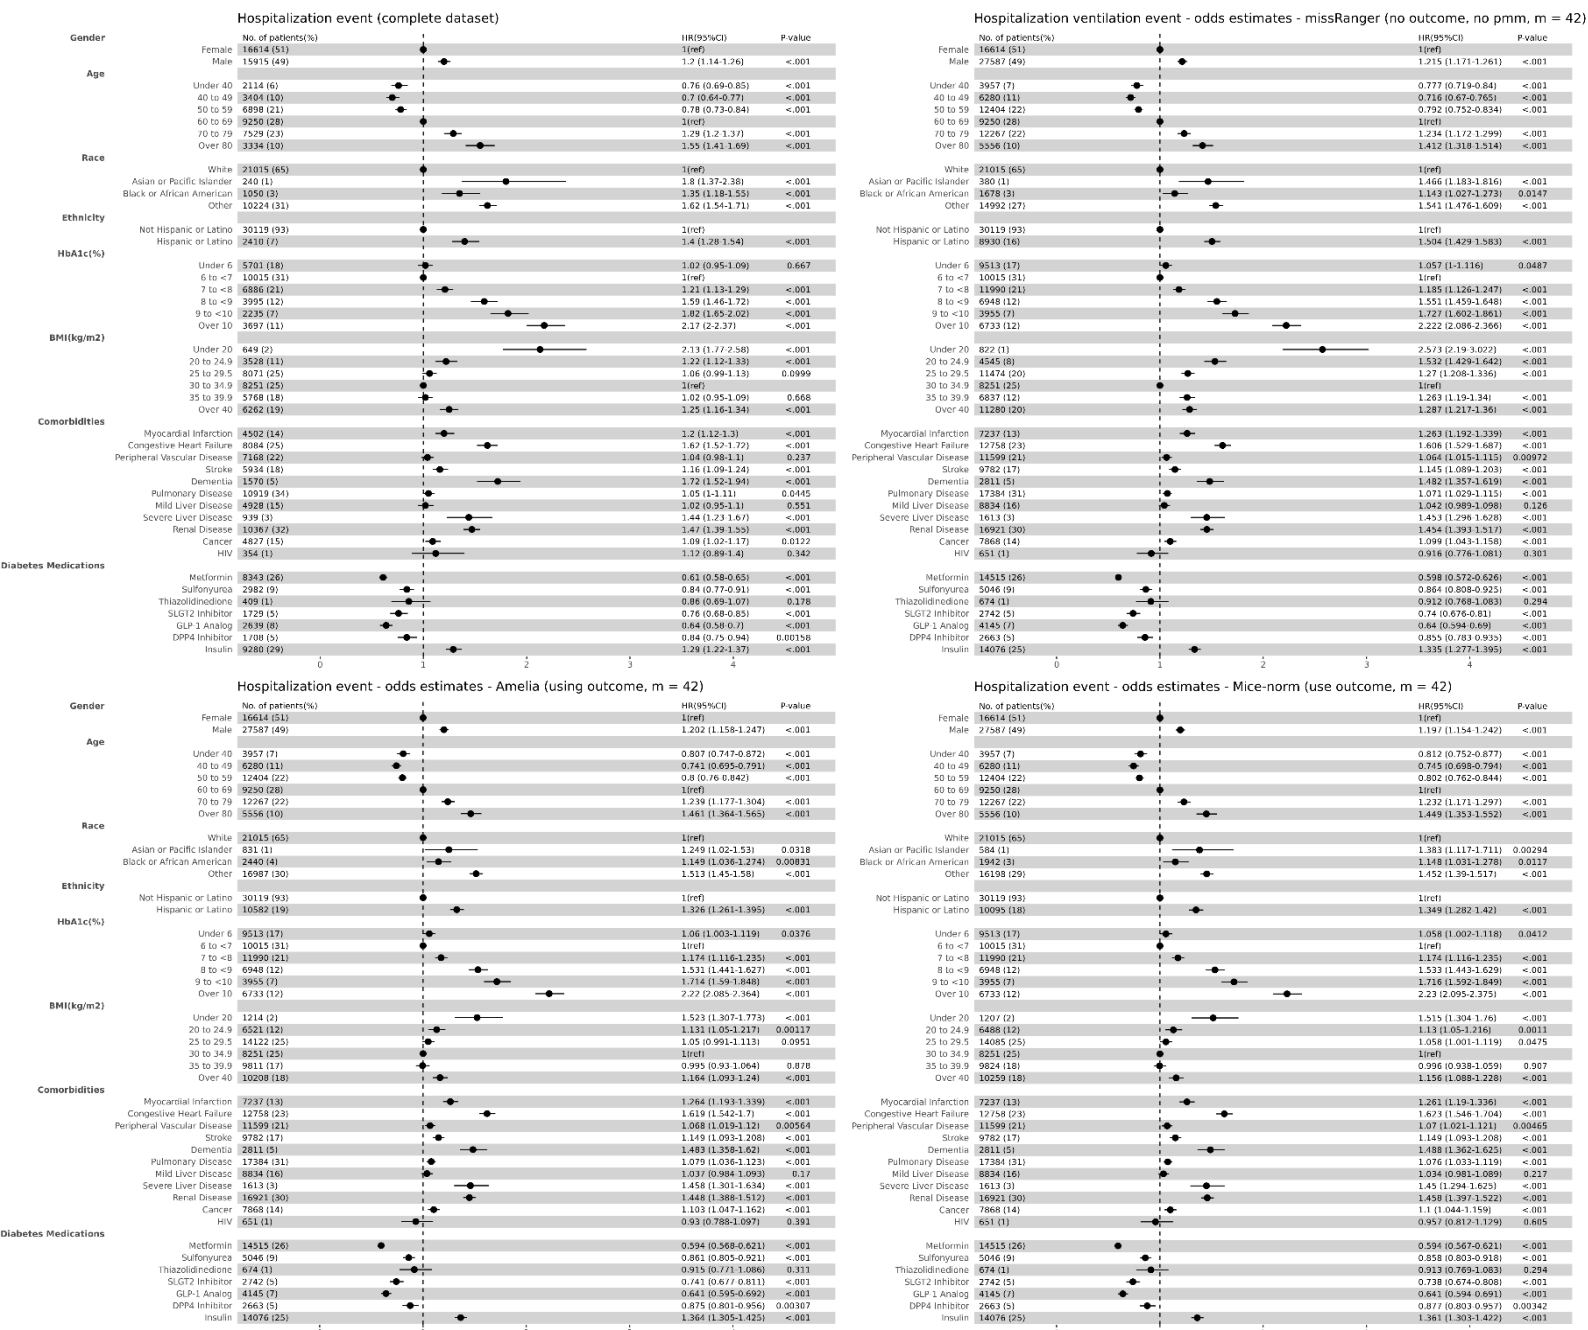

**Figure S4:** Hospitalization event: estimates obtained on the complete dataset obtained by listwise deletion (top-left) and on the full dataset by the best missRanger (top-right), Amelia (bottom-left), and Mice (bottom-right) models. For missRanger we used no pmm, we did not use the outcome variables in the imputation model, we one-hot encoded categorical predictors and binned numeric predictors (age, BMI, and HbA1c), and we used an univariate imputation order given by the decreasing number of missing values; for Mice-norm we included the outcome variables in the imputation model, we used an univariate imputation order given by the increasing number of missing values; for Amelia we included the outcome variables in the imputation model.

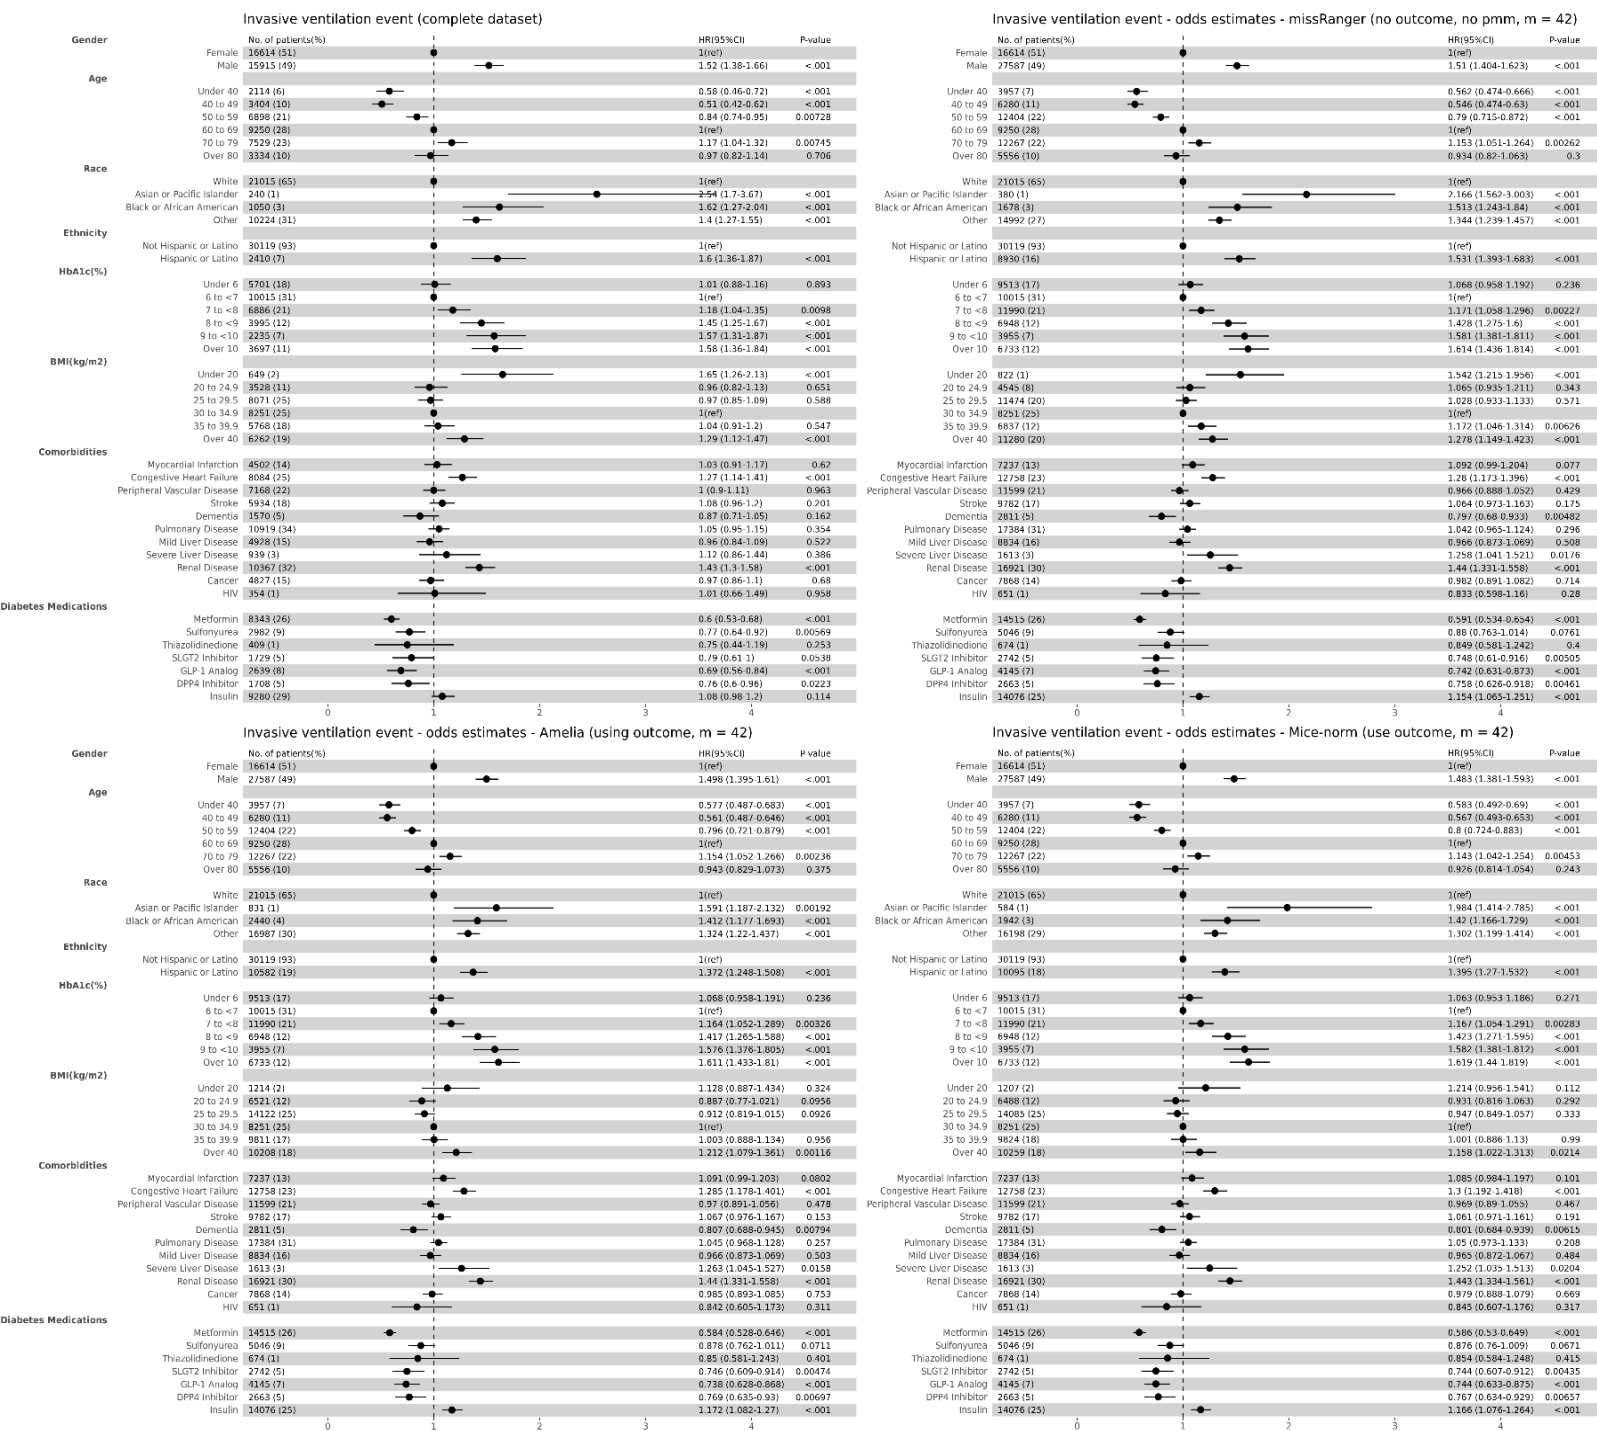

**Figure S5:** Invasive ventilation event: estimates obtained from the complete dataset obtained by listwise deletion (top-left) and on the full dataset by the MI estimation pipelines that using the best missRanger (top-right), Amelia (bottom-left), and Mice (bottom-right) models. For missRanger we used no pmm, we did not use the outcome variables in the imputation model, we one-hot encoded categorical predictors and binned numeric predictors (age, BMI, and HbA1c), and we used an univariate imputation order given by the decreasing number of missing values; for Mice-norm we included the outcome variables in the imputation model, we used an univariate imputation order given by the increasing number of missing values; for Amelia we included the outcome variables in the imputation model.

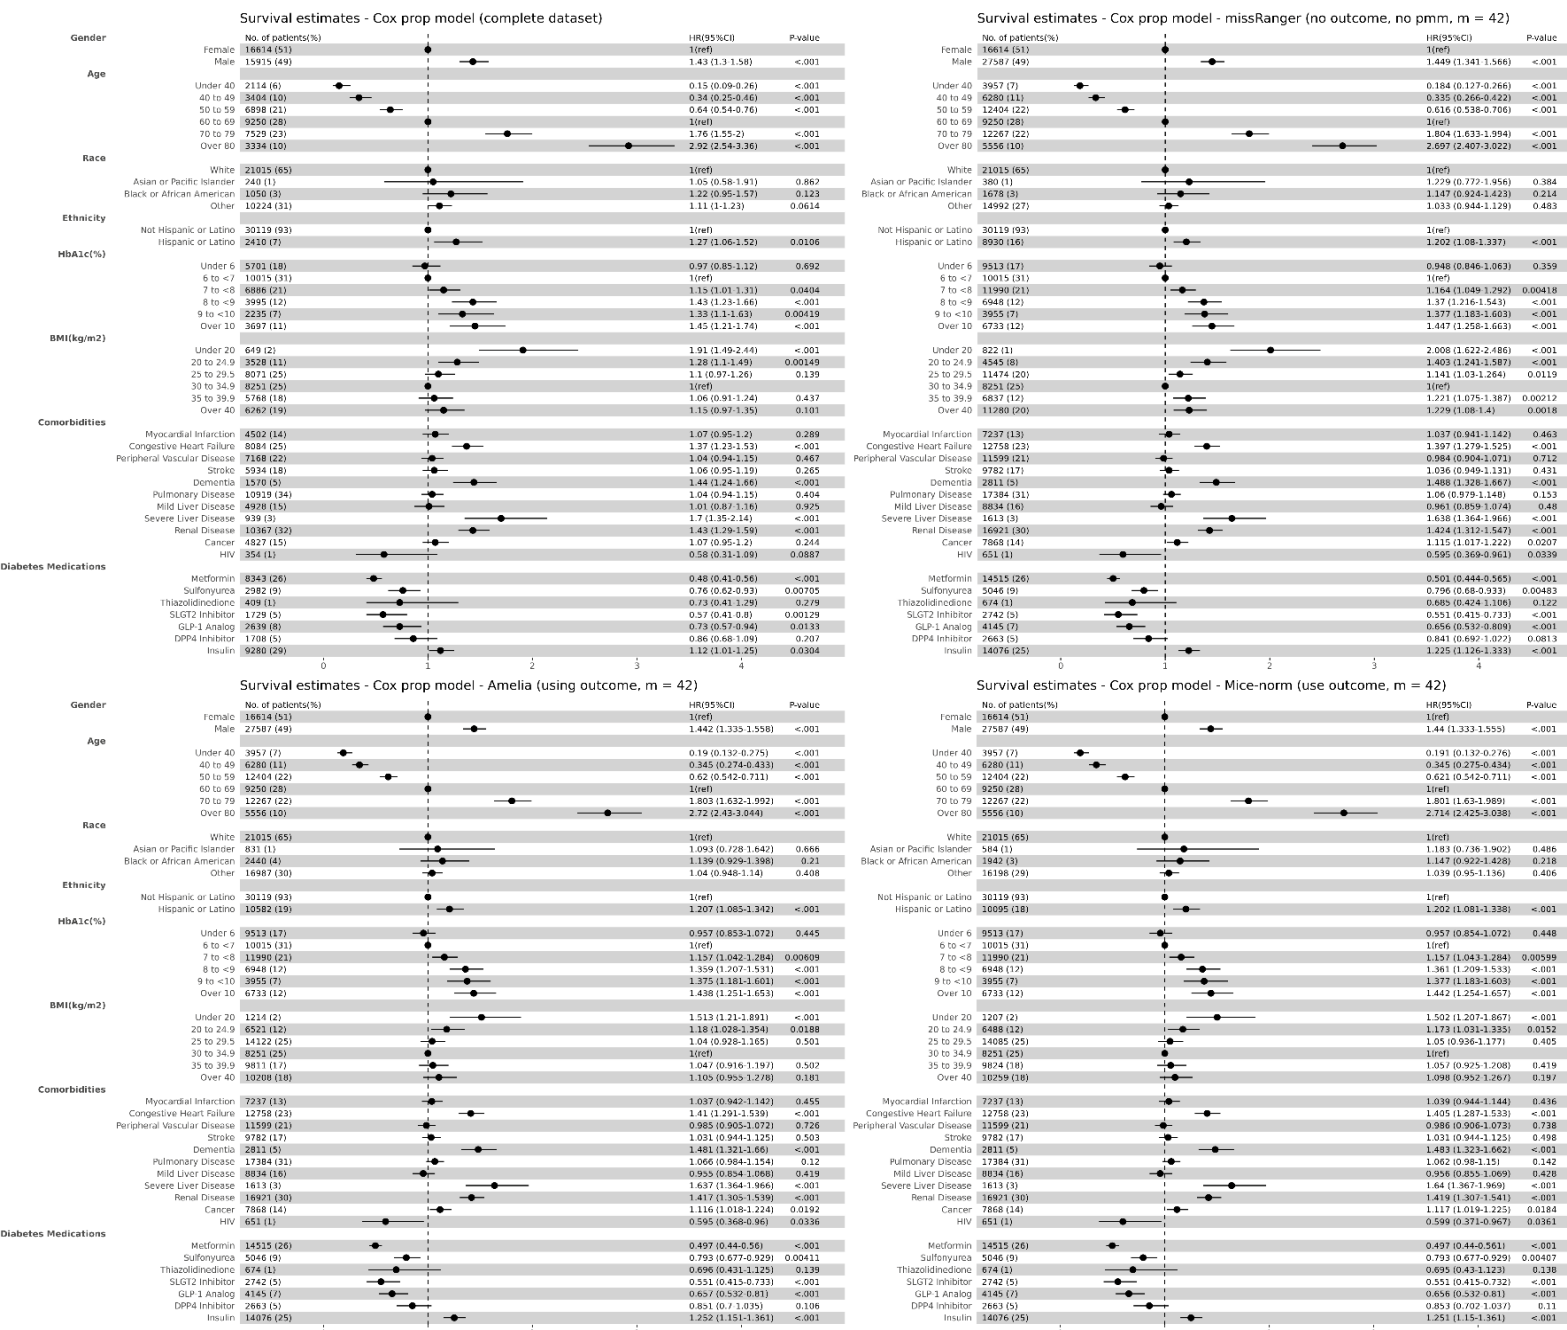

**Figure S6:** Death event: estimates obtained on the complete dataset obtained by listwise deletion (top-left) and on the full dataset by the MI estimation pipelines that using the best missRanger (top-right), Amelia (bottom-left), and Mice (bottom-right) models. For missRanger we used no pmm, we did not use the outcome variables in the imputation model, we one-hot encoded categorical predictors and binned numeric predictors (age, BMI, and HbA1c), and we used an univariate imputation order given by the decreasing number of missing values; for Mice-norm we included the outcome variables in the imputation model, we used an univariate imputation order given by the increasing number of missing values; for Amelia we included the outcome variables in the imputation model.
